# Supplementary material
Source: PubMed Central journal article supplement (PMC8159869)
Supplement: NIHMS1654145-supplement-Sup_Fig_S1.pdf [file NIHMS1654145-supplement-Sup_Fig_S1.pdf]

**Figure S1:** Rolling average incidence of a) stroke/SEE, b) major hemorrhage, and c) composite endpoint versus kidney function for ARISTOTLE (top), RE-LY (middle), and ENGAGE (bottom) trials. Warfarin (solid, red, circles) was a common comparator arm included in each trial. The investigational treatment arms from ARISTOTLE (apixaban 5 mg – blue, solid, circle), RE-LY (dabigatran 110 mg – green, dotted, ‘x’; dabigatran 150 mg – green, solid, square), and ENGAGE (edoxaban 30 mg – purple, dotted, ‘x’; edoxaban 60 mg – purple, solid, square) are included on each figure.

a)

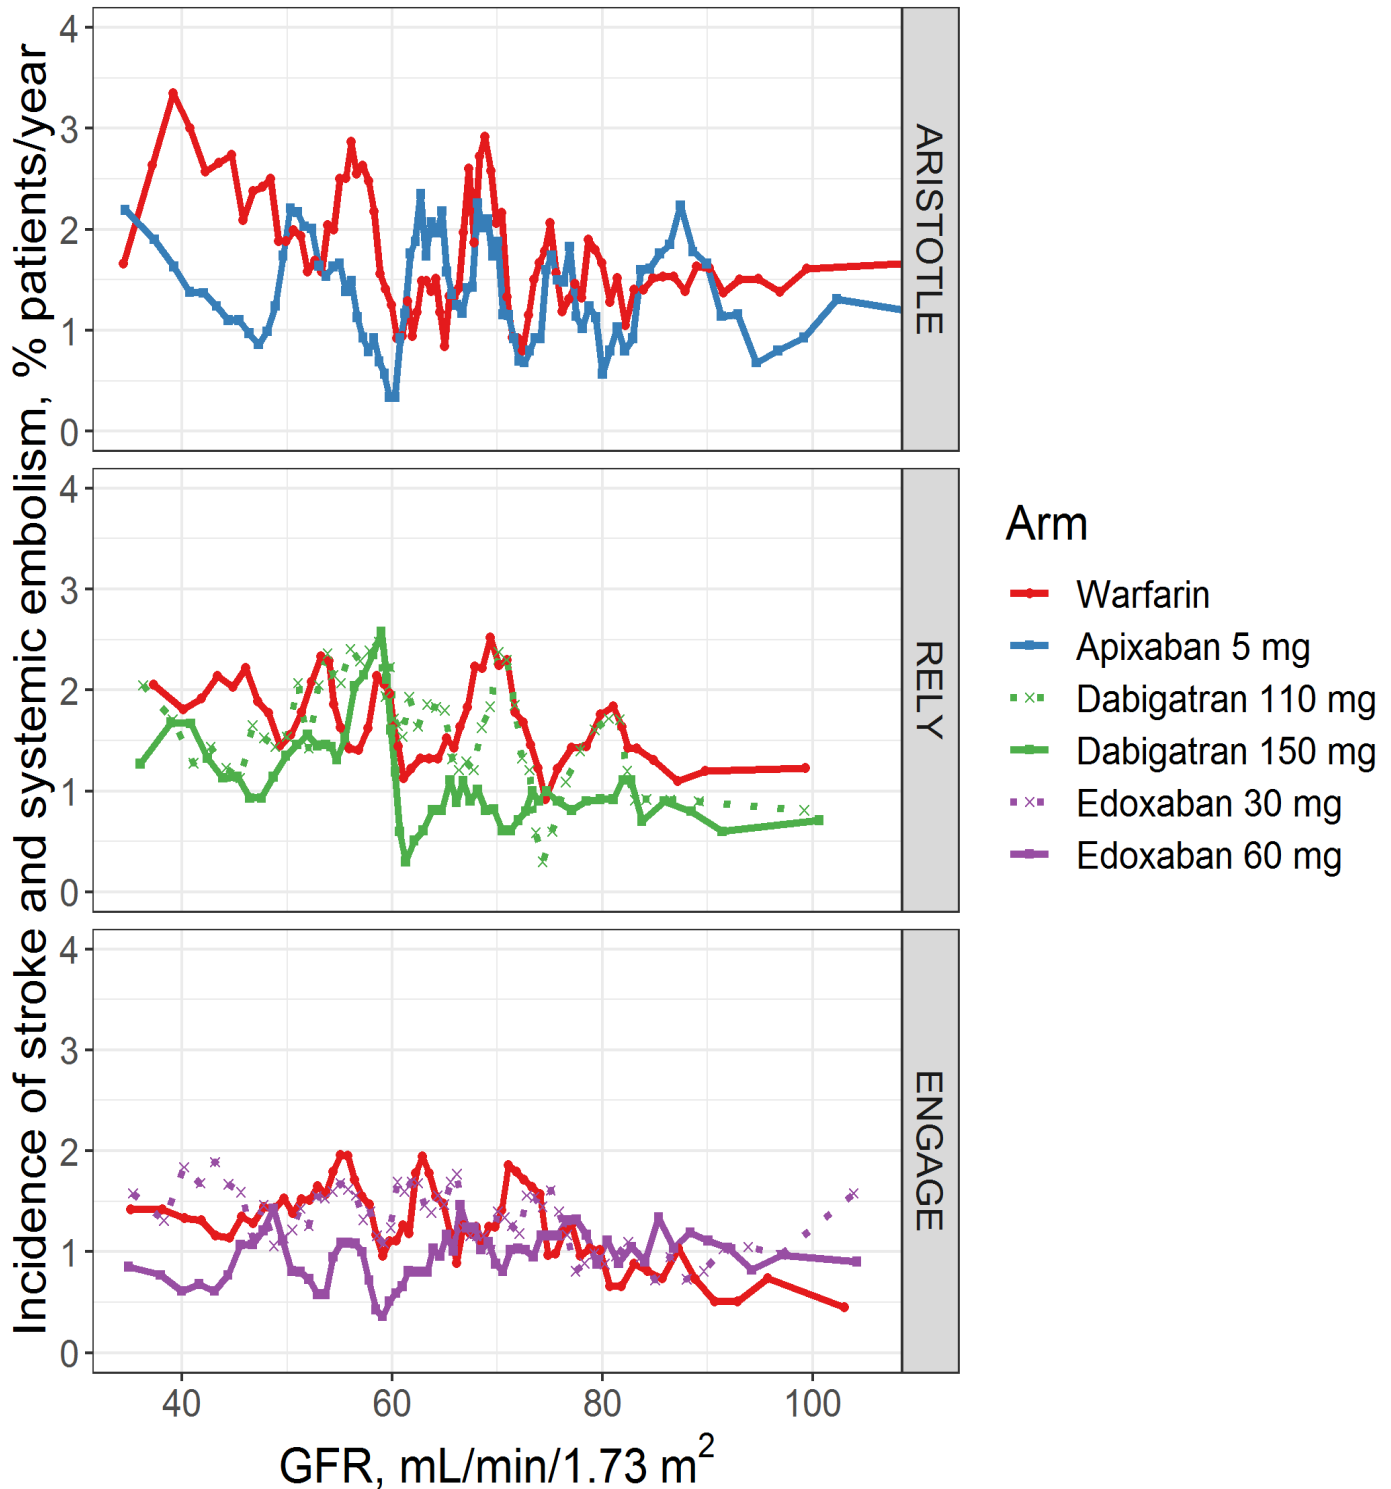

b)

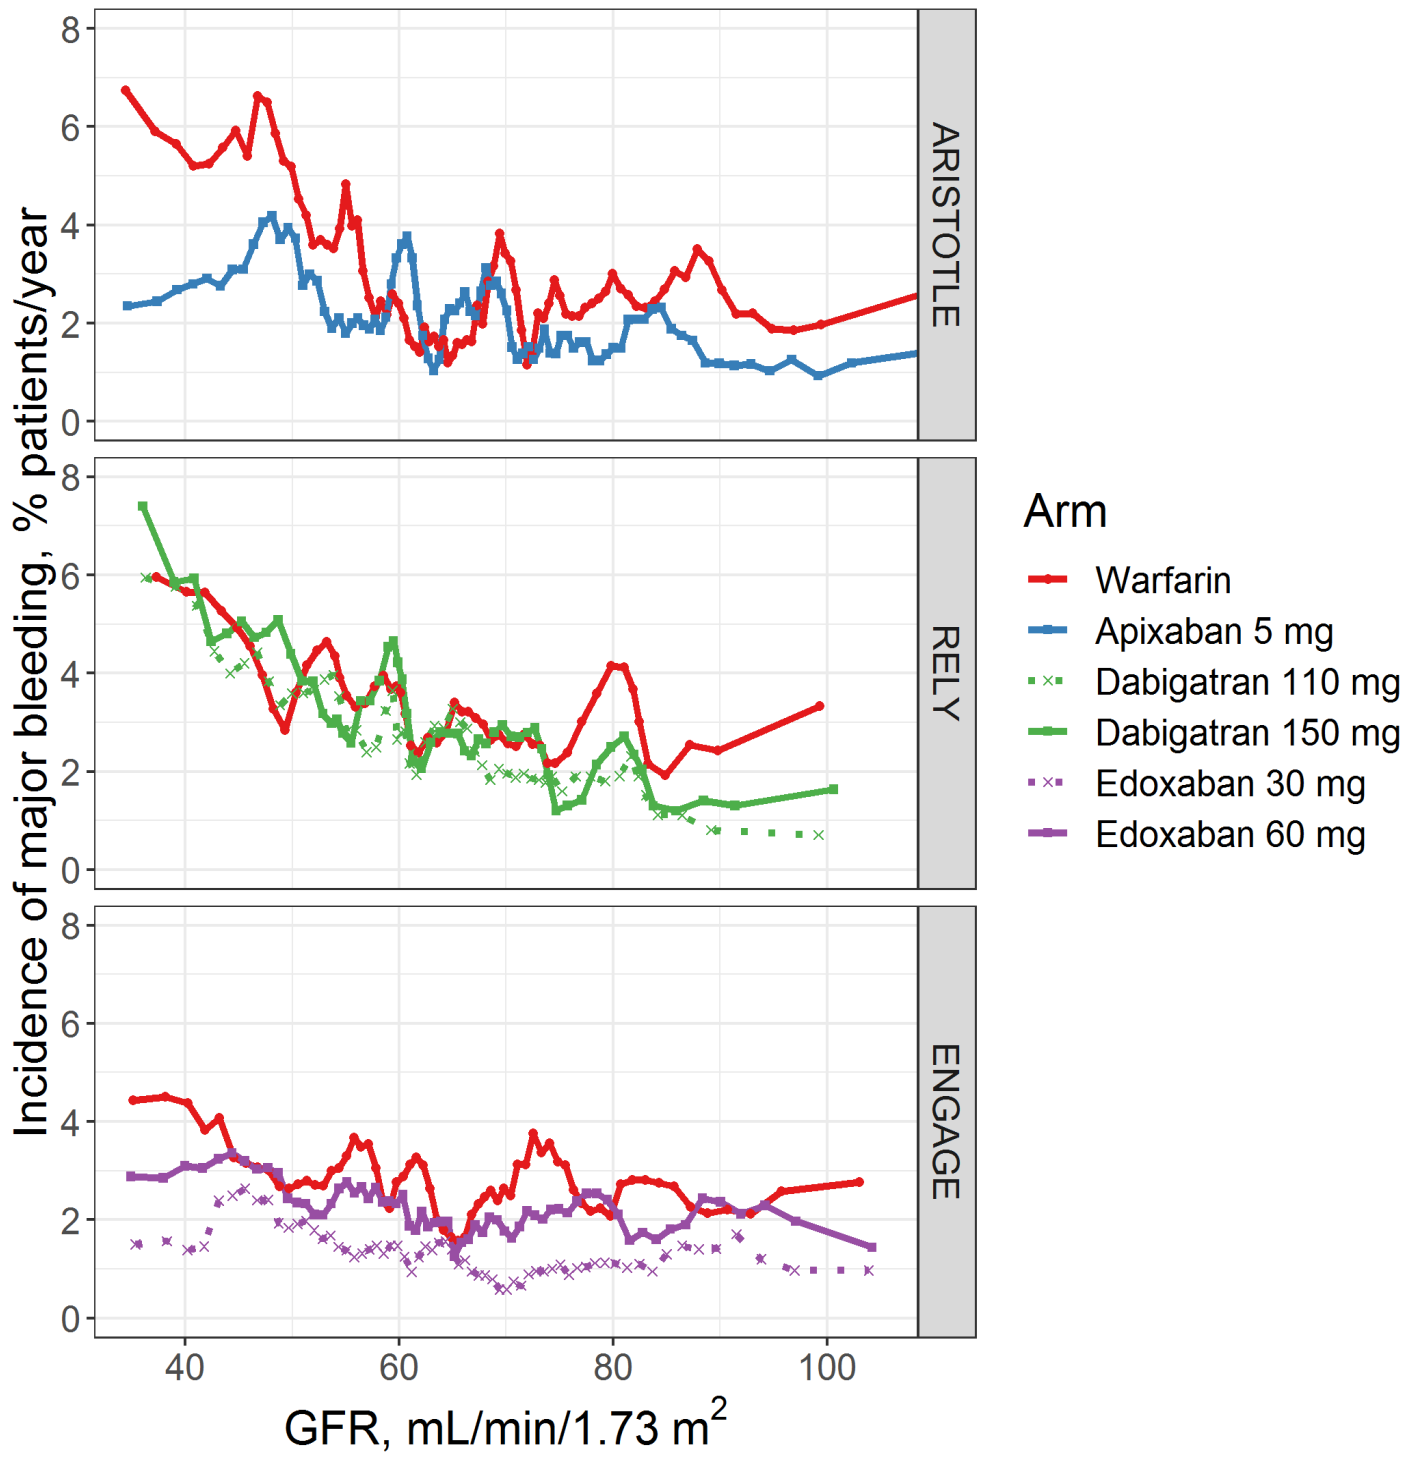

c)

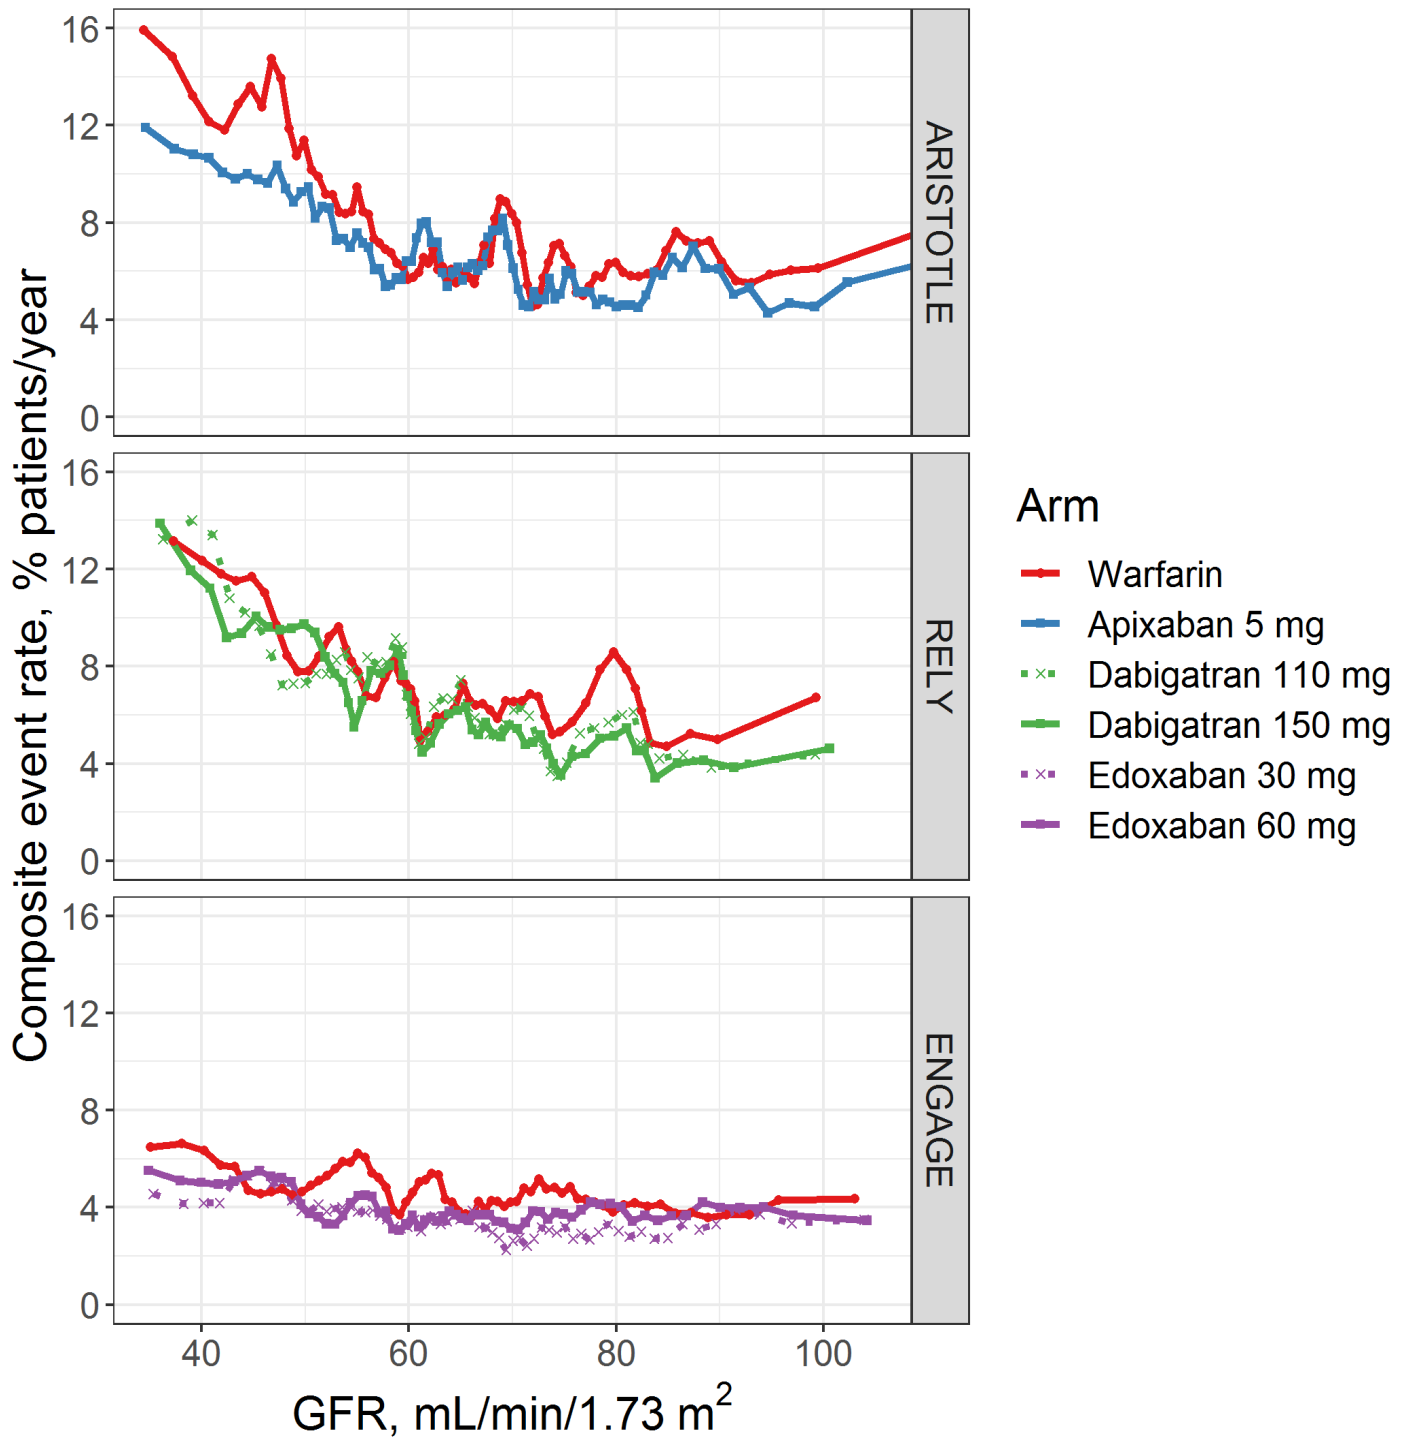

**Footnote:** A moving average<sup>1</sup> of the stroke and systemic embolism (SEE), major bleeding and composite (stroke/SEE/major bleeding/death) endpoint versus GFR was calculated for each treatment arm to depict the continuous relationship between event rate and this independent variable. Subjects in each treatment arm were ordered sequentially from lowest GFR to highest GFR value. The event rate and median GFR was calculated for the first 1000 patients (window width of 1000 patients) and plotted on the figure. The window was then shifted forward, removing the last 100 patients from the sequence and including the next 100 patients in the sequence (window frame of 100 patients). This process was repeated until the last patient in the treatment arm was reached.

1 Ref: Weisstein, Eric W. "Moving Average." From MathWorld--A Wolfram Web Resource. <http://mathworld.wolfram.com/MovingAverage.html>
