# Supplementary material
Source: PubMed Central journal article supplement (PMC8159869)

**Figure S2:** Representation of a) women, b) race, c) AF type and d) CHADS Score and e) antiplatelet co-therapy within each kidney function category in RE-LY, ARISTOTLE, and ENGAGE

**2a: Representation of women by kidney function in RE-LY, ARISTOTLE, and ENGAGE**

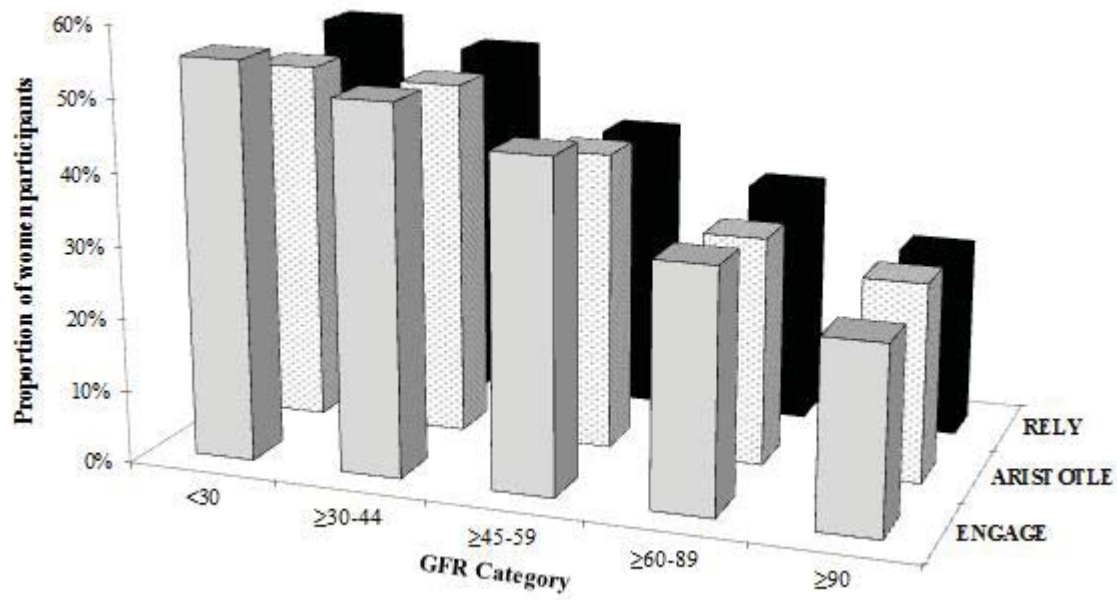

## 2b: Representation of race by kidney function

RE-LY

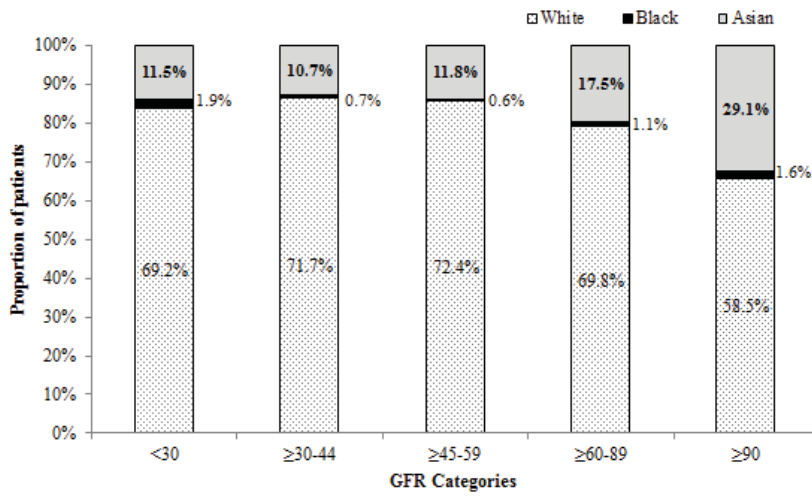

ARISTOTLE

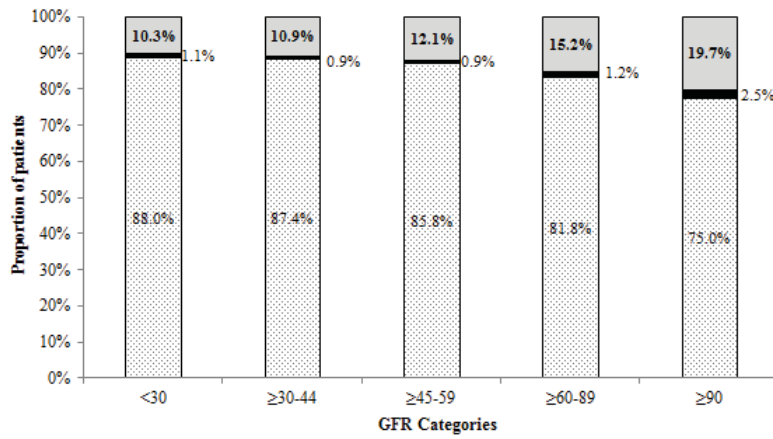

ENGAGE

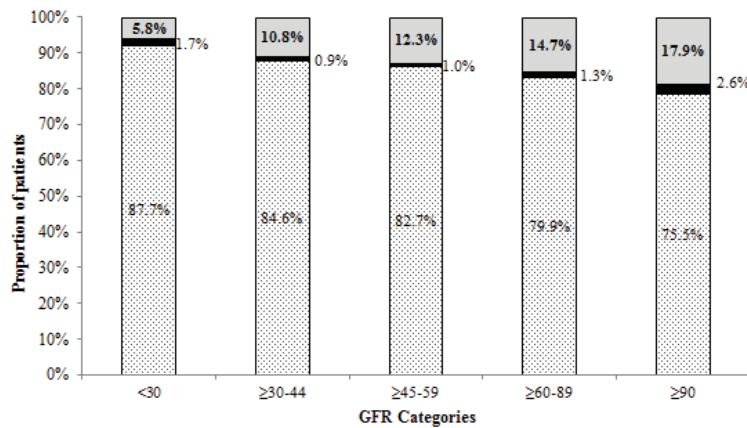

## 2C: Representation of AF types by kidney function in a) RE-LY, b) ARISTOTLE, and c) ENGAGE

### RE-LY

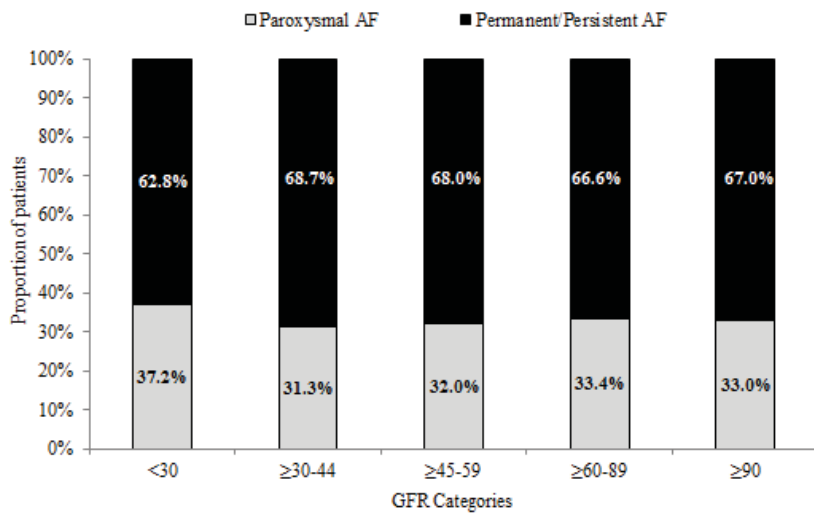

### ARISTOTLE

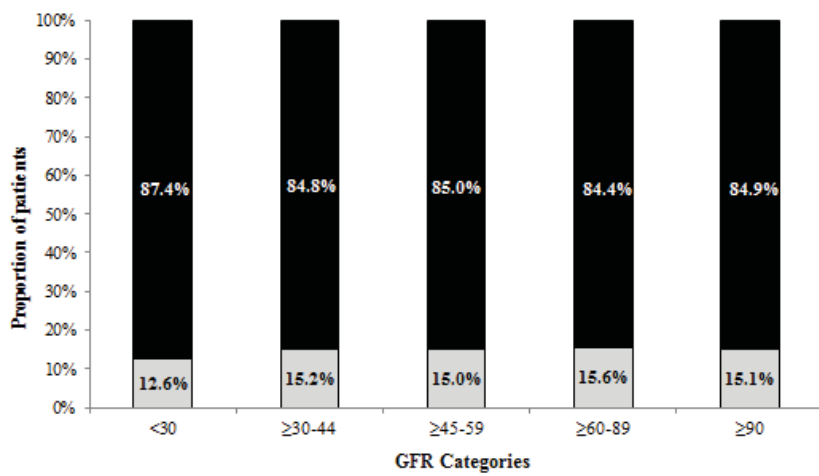

### ENGAGE

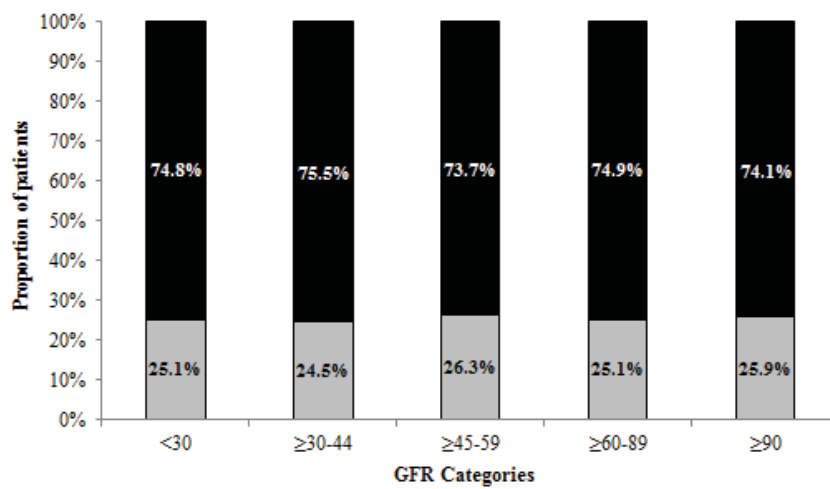

2d: Representation of CHADS<sub>2</sub> Score by kidney function

RE-LY

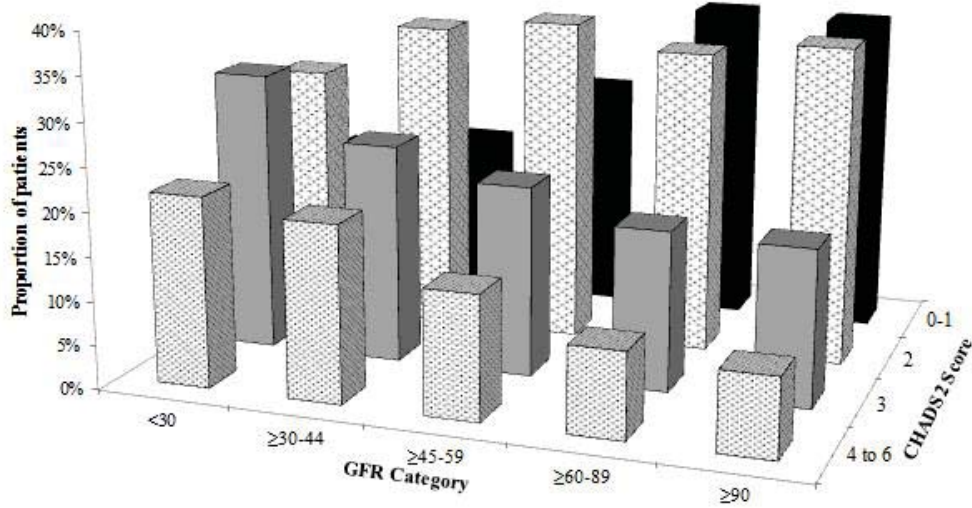

ARISTOTLE

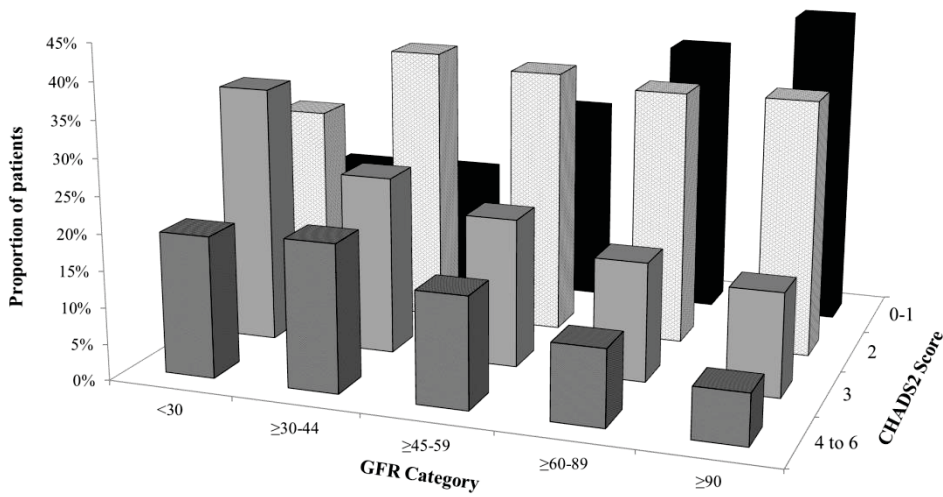

ENGAGE

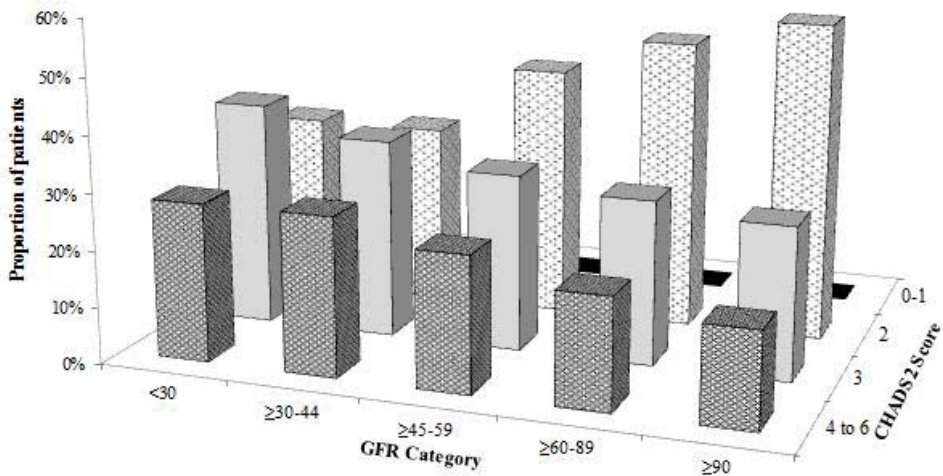

2e: Representation of users on antiplatelet co-therapy within each kidney function category in RE-LY, ARISTOTLE, and ENGAGE

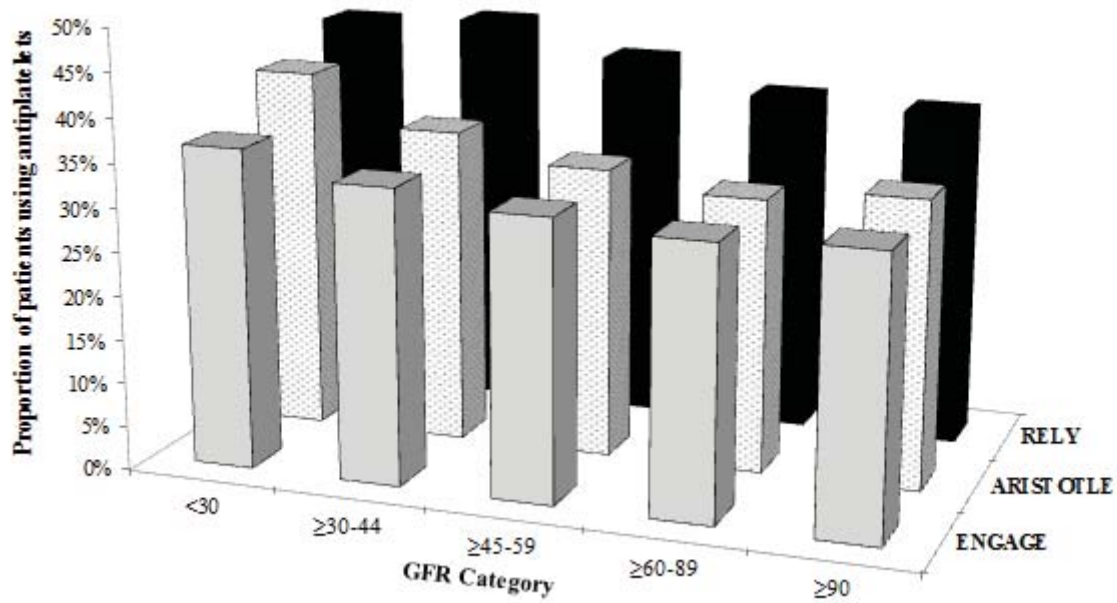

Supplement: NIHMS1654145-supplement-Sup_fig_S2.pdf [file NIHMS1654145-supplement-Sup_fig_S2.pdf]
